# Supplementary material for: A positive feedback loop between RIP3 and JNK controls non-alcoholic steatohepatitis
Source: PubMed Central journal article supplement (PMC4154133; doi:10.15252/emmm.201403856), 2014-06-24
Supplement: emmm0006-1062-sd1.pdf [file emmm0006-1062-sd1.pdf]

## Supporting Information Fig S1

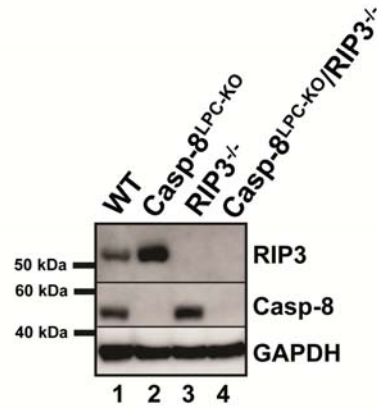

### Supp Information Fig S1:

Western blot analysis of whole liver-protein extracts from WT, Caspase-8<sup>LPC-KO</sup>, Caspase-8<sup>LPC-KO</sup>/RIP3<sup>-/-</sup> and RIP3<sup>-/-</sup> untreated-mice, using antibodies against Caspase-8, RIP3 and GAPDH as loading control.
