# Supplementary material for: A positive feedback loop between RIP3 and JNK controls non-alcoholic steatohepatitis
Source: PubMed Central journal article supplement (PMC4154133; doi:10.15252/emmm.201403856), 2014-06-24
Supplement: emmm0006-1062-sd3.pdf [file emmm0006-1062-sd3.pdf]

### Supporting Information Fig S3

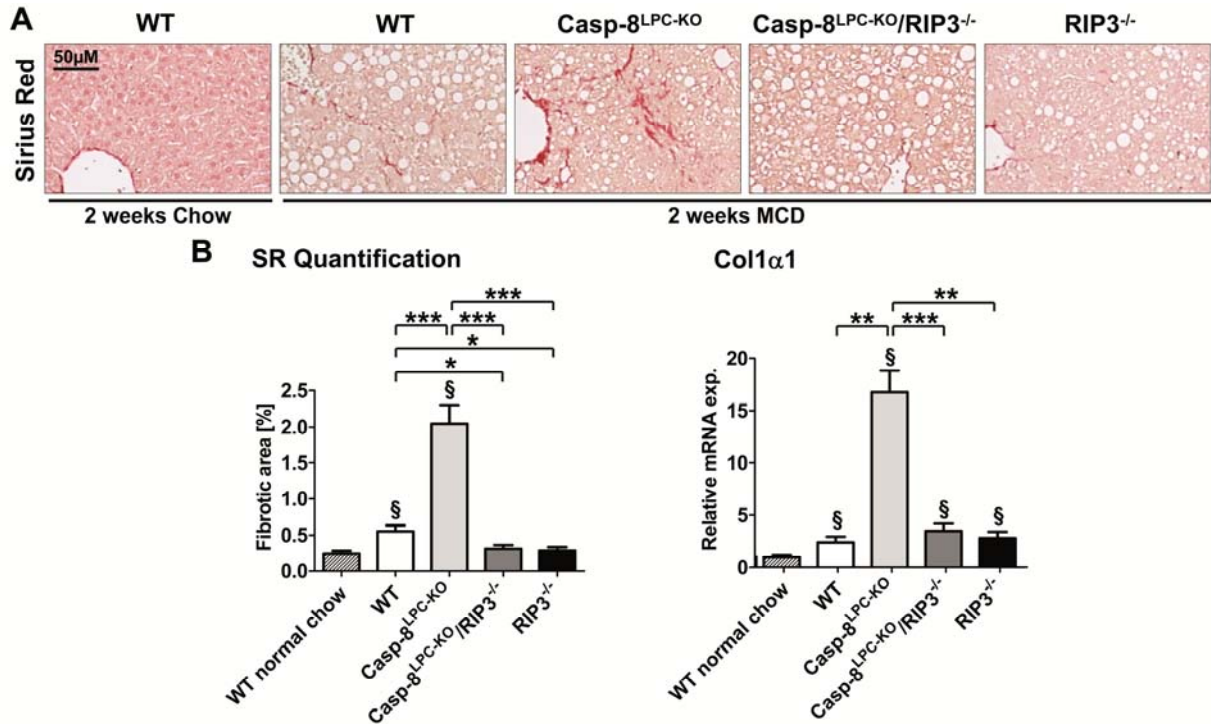

**Supporting Information Fig S3: RIP3 mediates the transition from steatosis to MCD-induced fibrosis in Caspase-8-deficient livers.**

(A) Representative Sirius Red stainings of liver slides from WT, Casp-8<sup>LPC-KO</sup>, Casp-8<sup>LPC-KO</sup>/RIP3<sup>-/-</sup> and RIP3<sup>-/-</sup> mice fed for two weeks with MCD-diet.

(B) Left: statistical quantification of light polarized Sirius Red pictures, results are shown as mean, n=6 per group. Right: *Col1α1* mRNA levels were determined by qRT-PCR. Values were calculated relative to WT mice fed with normal show and β-catenin was used as an internal standard, n=6 per group. § (\**P*<0.05) indicates that fibrotic area and *Col1α1* are significantly increased from basal WT group.
