# Supplementary material for: A positive feedback loop between RIP3 and JNK controls non-alcoholic steatohepatitis
Source: PubMed Central journal article supplement (PMC4154133; doi:10.15252/emmm.201403856), 2014-06-24
Supplement: emmm0006-1062-sd4.pdf [file emmm0006-1062-sd4.pdf]

### Supporting Information Fig S4

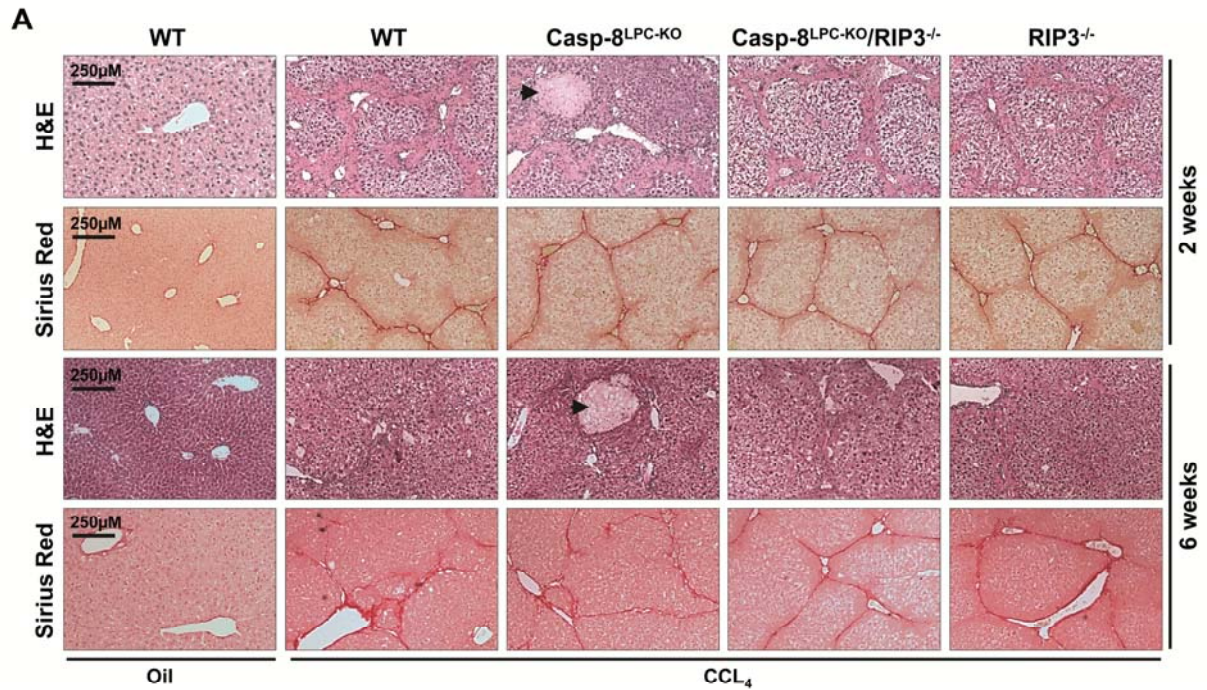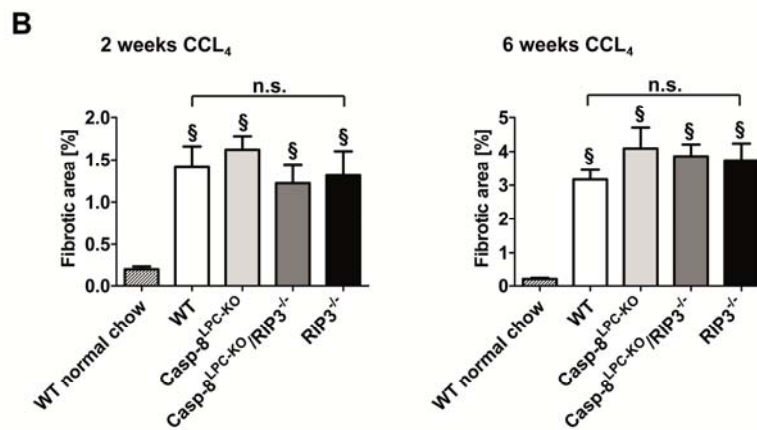

**Supporting Information Fig S4: RIP3 deficiency does not protect against liver fibrosis in CCL<sub>4</sub>-induced liver injury.**

(A) Representative H&E and Sirius Red stainings of WT, Casp-8<sup>LPC-KO</sup>, Casp-8<sup>LPC-KO</sup>/RIP3<sup>-/-</sup> and RIP3<sup>-/-</sup> mice injected twice weekly with carbon tetrachloride (CCL<sub>4</sub>) for 2 and 6 weeks. Black arrows indicate necrotic areas seen in Casp-8<sup>LPC-KO</sup> mice.

**(B)** Statistical quantification of light polarized Sirius Red pictures, results are shown as mean,  
n=6 per group.
