# Supplementary material for: A positive feedback loop between RIP3 and JNK controls non-alcoholic steatohepatitis
Source: PubMed Central journal article supplement (PMC4154133; doi:10.15252/emmm.201403856), 2014-06-24
Supplement: emmm0006-1062-sd5.pdf [file emmm0006-1062-sd5.pdf]

## Supporting Information Fig S5

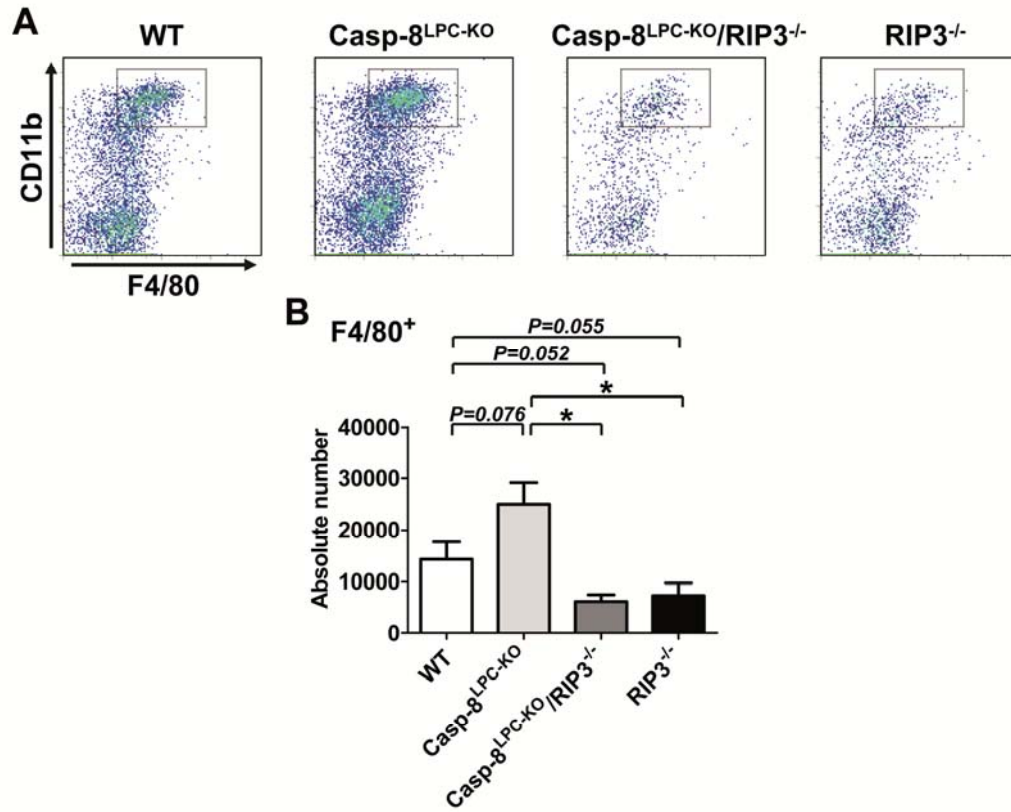

### Supporting Information Fig S5: RIP3 promotes the hepatic recruitment of F4/80<sup>+</sup> cells.

(A) Representative FACS plots for myelo-monocytic cells (F4/80<sup>+</sup>) from individual mice of the indicated genotypes after two weeks of MCD-diet feeding.

(B) Statistical analysis of FACS data for intrahepatic levels of myelo-monocytic cells in the indicated mouse groups after two weeks of MCD-diet feeding. Results are shown as mean, error bars indicate SEM, n=5.
