# Supplementary material for: A positive feedback loop between RIP3 and JNK controls non-alcoholic steatohepatitis
Source: PubMed Central journal article supplement (PMC4154133; doi:10.15252/emmm.201403856), 2014-06-24
Supplement: emmm0006-1062-sd6.pdf [file emmm0006-1062-sd6.pdf]

## Supporting Information Fig S6

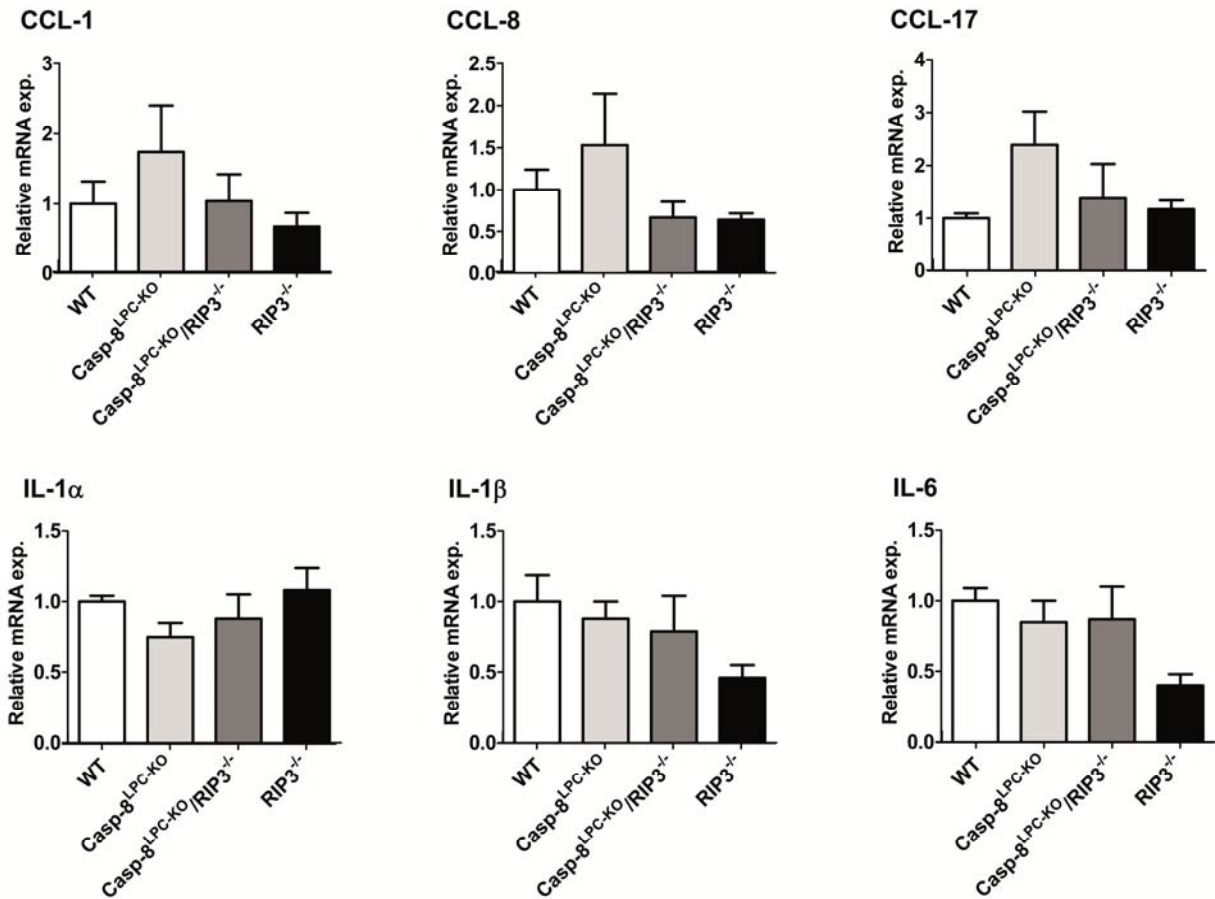

**Supporting Information Fig S6: mRNA levels of pro-inflammatory cytokines in mice fed 2 weeks with MCD-diet.**

*CCL-1*, *CCL-8*, *CCL-17*, *IL-1 $\alpha$* , *IL-1 $\beta$* , *IL-6* mRNA levels were assessed by RT-PCR, n=6 per groups, values were calculated relative to WT mice and  $\beta$ -catenin was used as an internal standard. Error bars represent SEM.
