# Supplementary material for: A positive feedback loop between RIP3 and JNK controls non-alcoholic steatohepatitis
Source: PubMed Central journal article supplement (PMC4154133; doi:10.15252/emmm.201403856), 2014-06-24
Supplement: emmm0006-1062-sd7.pdf [file emmm0006-1062-sd7.pdf]

## Supporting Information Fig S7

**A**

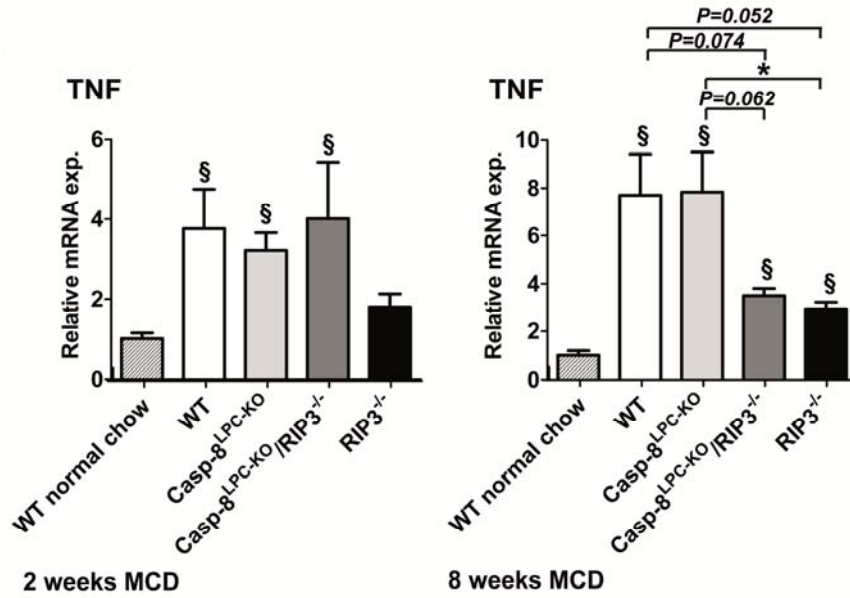

**B**

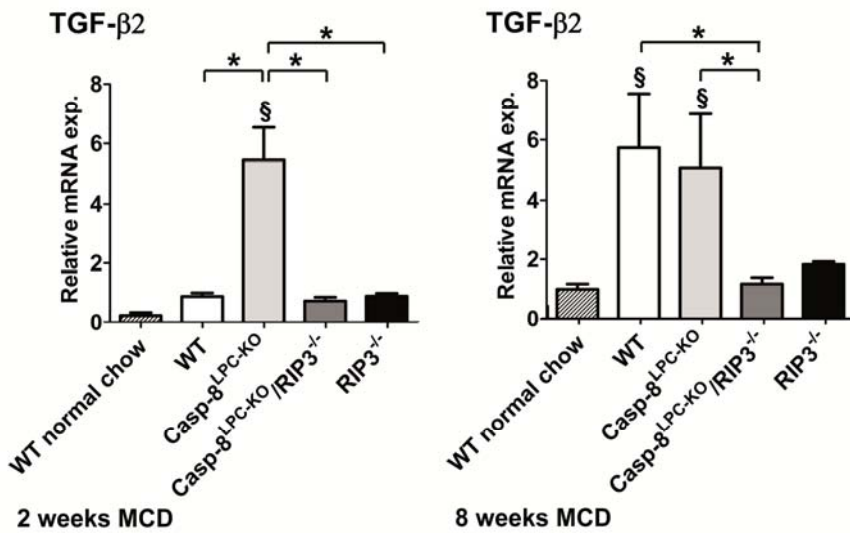

Supporting Information Fig S7: Analysis of TGF-β2 and TNF expression in MCD-induced NASH.

(A) *TNF- $\alpha$*  and (B) *TGF- $\beta$ 2* mRNA levels were assessed by RT-PCR in the indicated genotypes, values were calculated relative to WT mice fed with normal show and  $\beta$ -catenin was used as an internal standard, n=6 per group. § (\* $P$ <0.05) indicates mRNA levels are significantly increased compared to basal values in the WT group.
