# Supplementary material for: A positive feedback loop between RIP3 and JNK controls non-alcoholic steatohepatitis
Source: PubMed Central journal article supplement (PMC4154133; doi:10.15252/emmm.201403856), 2014-06-24
Supplement: emmm0006-1062-sd9.pdf [file emmm0006-1062-sd9.pdf]

## Supporting Information Fig S9

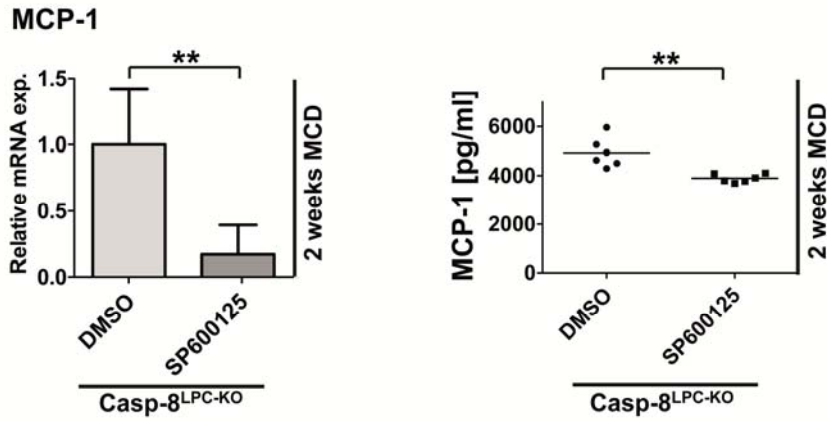

**Supporting Information Fig S9: RIP3 controls MCP-1 release through activation of Jun-(N)-terminal kinase (JNK).**

Left: *MCP-1* mRNA levels were assessed by RT-PCR, n= 6 per group, values were calculated relative to Casp-8<sup>LPC-KO</sup> mice treated with DMSO and  $\beta$ -catenin was used as an internal standard, n=6 per group. Right: FACS-based micro-beads fluorescence assay for MCP-1 expression in liver protein homogenates, n=6 per group.
