# Supplementary material for: A positive feedback loop between RIP3 and JNK controls non-alcoholic steatohepatitis
Source: PubMed Central journal article supplement (PMC4154133; doi:10.15252/emmm.201403856), 2014-06-24
Supplement: emmm0006-1062-sd10.pdf [file emmm0006-1062-sd10.pdf]

## Supporting Information Fig S10

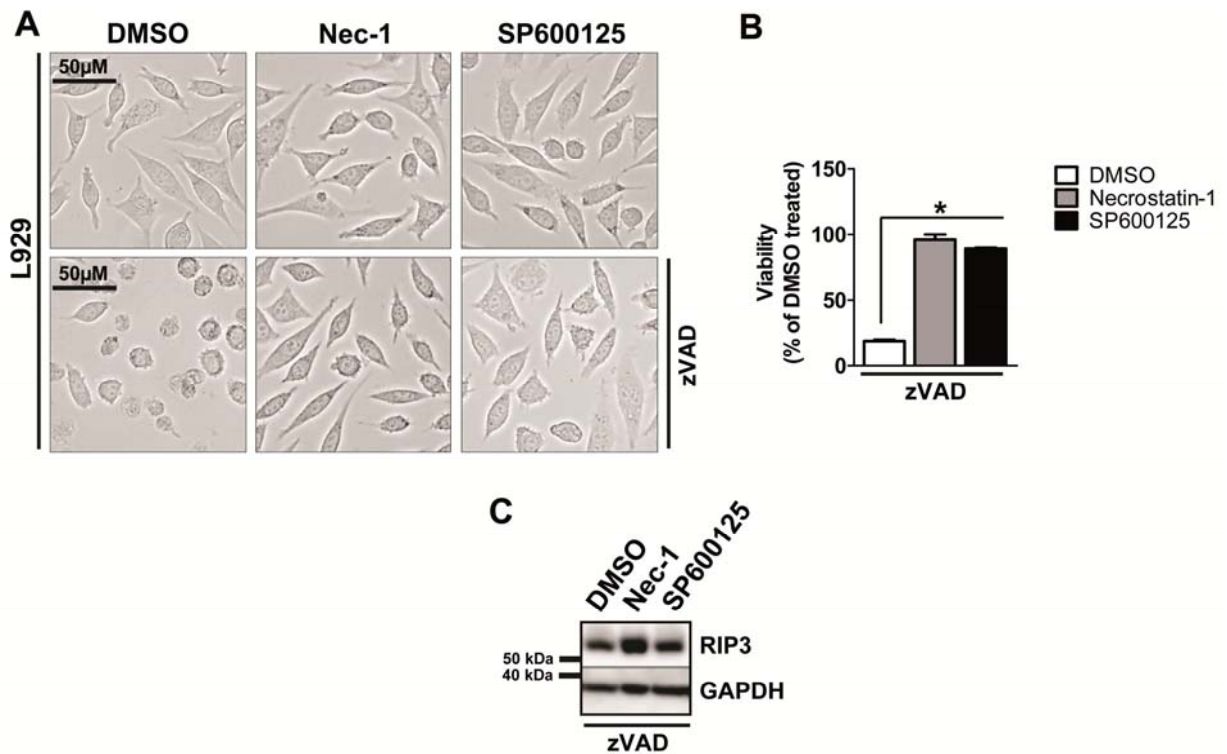

**Supporting Information Fig S10: JNK inhibition blocks zVAD-induced necroptosis and reduces expression levels of RIP3.**

(A) Morphological features of L929 cells treated for 19h with zVAD, Nec-1 and SP600125 as indicated.

(B) Cell survival analysis using a MTT assay after 19 hours of zVAD stimulation of L929 cells additionally treated with Nec-1, SP600125 or DMSO as a control. Error bars indicate SEM of duplicates and data are representative of at least three independent experiments.

(C) Western blot analysis of L929 cells treated with the indicated substances for 8 hours, using antibodies against RIP3 and GAPDH as loading control.
