# Supplementary material for: A positive feedback loop between RIP3 and JNK controls non-alcoholic steatohepatitis
Source: PubMed Central journal article supplement (PMC4154133; doi:10.15252/emmm.201403856), 2014-06-24
Supplement: emmm0006-1062-sd11.pdf [file emmm0006-1062-sd11.pdf]

## Supporting Information Fig S11

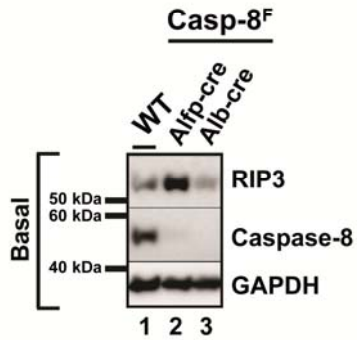

**Supporting Information Fig S11: RIP3 is over-expressed in Alfp-cre mice compared to Alb-cre mice.**

Western blot analysis of whole liver-protein extracts from WT, Alfp-cre- and Alb-cre-Caspase-8<sup>Floxed</sup> mice, using antibodies against Caspase-8, RIP3 and GAPDH as loading control.
