# Supplementary material for: A positive feedback loop between RIP3 and JNK controls non-alcoholic steatohepatitis
Source: PubMed Central journal article supplement (PMC4154133; doi:10.15252/emmm.201403856), 2014-06-24
Supplement: emmm0006-1062-sd12.pdf [file emmm0006-1062-sd12.pdf]

## Supplementary Table S1

### Listing of exact *p*-Values and Statistical Tests in each sub-Figure

| Figure 1A         | AST       | <i>p</i> values |                                         |
|-------------------|-----------|-----------------|-----------------------------------------|
| 2 weeks Chow      | C8-WT     | <b>0,0292</b>   | Mann Whitney test                       |
|                   | C8-C8R3   | <b>0,009</b>    | Unpaired t-test                         |
|                   | C8-R3     | <b>0,0295</b>   | Unpaired t-test                         |
| 2 weeks MCD       | C8-WT     | <b>0,0119</b>   | Mann Whitney test                       |
|                   | C8-C8R3   | <b>0,0015</b>   | Unpaired t test with Welch's correction |
|                   | C8-R3     | <b>0,0019</b>   | Unpaired t test with Welch's correction |
|                   | WT-C8R3   | <b>0,05</b>     | Mann Whitney test                       |
|                   | WT-R3     | <b>0,0422</b>   | Mann Whitney test                       |
| 8 weeks MCD       | C8-WT     | <b>0,0079</b>   | Mann Whitney test                       |
|                   | C8-C8R3   | <b>0,0119</b>   | Mann Whitney test                       |
|                   | C8-R3     | <b>0,0119</b>   | Mann Whitney test                       |
|                   | WT-C8R3   | <b>0,0062</b>   | Unpaired t-test                         |
|                   | WT-R3     | <b>0,0098</b>   | Unpaired t test with Welch's correction |
| 2w MCD vs 2w Chow | WT-WT     | <b>0,0004</b>   | Mann Whitney test                       |
|                   | C8-C8     | <b>0,0001</b>   | Unpaired t test with Welch's correction |
|                   | C8R3-C8R3 | <b>0,0001</b>   | Unpaired t test with Welch's correction |
|                   | R3-R3     | <b>0,0001</b>   | Unpaired t test with Welch's correction |
|                   | ALT       | <i>p</i> values |                                         |
| 2 weeks MCD       | C8-WT     | <b>0,0312</b>   | Unpaired t test with Welch's correction |
|                   | C8-C8R3   | <b>0,0091</b>   | Unpaired t test with Welch's correction |
|                   | C8-R3     | <b>0,0071</b>   | Unpaired t test with Welch's correction |
| 8 weeks MCD       | C8-WT     | <b>0,0128</b>   | Unpaired t-test                         |
|                   | C8-C8R3   | <b>0,0001</b>   | Unpaired t-test                         |
|                   | C8-R3     | <b>0,0001</b>   | Unpaired t-test                         |
|                   | WT-C8R3   | <b>0,0377</b>   | Unpaired t-test                         |
|                   | WT-R3     | <b>0,0422</b>   | Unpaired t test with Welch's correction |
| 2w MCD vs 2w Chow | WT-WT     | <b>0,0001</b>   | Unpaired t test with Welch's correction |
|                   | C8-C8     | <b>0,0002</b>   | Unpaired t test with Welch's correction |
|                   | C8R3-C8R3 | <b>0,0022</b>   | Mann Whitney test                       |
|                   | R3-R3     | <b>0,0005</b>   | Mann Whitney test                       |
|                   | GLDH      | <i>p</i> values |                                         |
| 2 weeks Chow      | C8-WT     | <b>0,0149</b>   | Unpaired t test with Welch's correction |
|                   | C8-C8R3   | <b>0,0154</b>   | Unpaired t test with Welch's correction |
|                   | C8-R3     | <b>0,0159</b>   | Unpaired t test with Welch's correction |
| 2 weeks MCD       | C8-WT     | <b>0,0039</b>   | Mann Whitney test                       |

|                   |           |               |                                         |
|-------------------|-----------|---------------|-----------------------------------------|
|                   | C8-C8R3   | <b>0,0048</b> | Mann Whitney test                       |
|                   | C8-R3     | <b>0,0006</b> | Mann Whitney test                       |
| 8 weeks MCD       | C8-WT     | <b>0,0017</b> | Unpaired t-test                         |
|                   | C8-C8R3   | <b>0,0001</b> | Unpaired t-test                         |
|                   | C8-R3     | <b>0,0002</b> | Unpaired t test with Welch's correction |
|                   | WT-C8R3   | <b>0,0026</b> | Unpaired t-test                         |
|                   | WT-R3     | <b>0,0071</b> | Unpaired t test with Welch's correction |
| 2w MCD vs 2w Chow | WT-WT     | <b>0,0004</b> | Mann Whitney test                       |
|                   | C8-C8     | <b>0,0057</b> | Mann Whitney test                       |
|                   | C8R3-C8R3 | <b>0,0001</b> | Unpaired t test with Welch's correction |
|                   | R3-R3     | <b>0,0005</b> | Mann Whitney test                       |

### Figure 1D

|  | <b>RIP3</b> | <b>p values</b> |                                         |
|--|-------------|-----------------|-----------------------------------------|
|  | C8-WT       | <b>0,0115</b>   | Unpaired t test with Welch's correction |
|  | C8-C8R3     | <b>0,0069</b>   | Unpaired t test with Welch's correction |
|  | C8-R3       | <b>0,0068</b>   | Unpaired t test with Welch's correction |
|  | WT-C8R3     | <b>0,0008</b>   | Unpaired t-test                         |
|  | WT-R3       | <b>0,0042</b>   | Unpaired t test with Welch's correction |
|  | WT-WTnc     | <b>0,0179</b>   | Mann Whitney test                       |
|  | C8-WTnc     | <b>0,0179</b>   | Mann Whitney test                       |

|  | <b>Ki67</b> | <b>p values</b> |                                         |
|--|-------------|-----------------|-----------------------------------------|
|  | C8-C8R3     | <b>0,0089</b>   | Unpaired t test with Welch's correction |
|  | C8-R3       | <b>0,0016</b>   | Unpaired t-test                         |
|  | WT-C8R3     | <b>0,0003</b>   | Unpaired t-test                         |
|  | WT-R3       | <b>0,0005</b>   | Unpaired t-test                         |
|  | WT-WTnc     | <b>0,0026</b>   | Unpaired t-test                         |
|  | C8-WTnc     | <b>0,0043</b>   | Unpaired t-test                         |

|             | <b>TG</b> | <b>p values</b> |                 |
|-------------|-----------|-----------------|-----------------|
| 8 weeks MCD | WT-C8R3   | <b>0,0365</b>   | Unpaired t-test |

### Figure 2D

|  | <b>Fibrotic Area</b> | <b>p values</b> |                                         |
|--|----------------------|-----------------|-----------------------------------------|
|  | C8-WT                | <b>0,0366</b>   | Unpaired t-test                         |
|  | C8-C8R3              | <b>0,0057</b>   | Unpaired t test with Welch's correction |
|  | C8-R3                | <b>0,0062</b>   | Unpaired t test with Welch's correction |
|  | WT-C8R3              | <b>0,0417</b>   | Unpaired t test with Welch's correction |
|  | WT-R3                | <b>0,0483</b>   | Unpaired t test with Welch's correction |
|  | WT-WTnc              | <b>0,0402</b>   | Unpaired t test with Welch's correction |
|  | C8-WTnc              | <b>0,0056</b>   | Unpaired t test with Welch's correction |

|  | <b>Col1 <math>\alpha</math>1</b> | <b>p values</b> |                                         |
|--|----------------------------------|-----------------|-----------------------------------------|
|  | C8-WT                            | <b>0,0307</b>   | Unpaired t test with Welch's correction |
|  | C8-C8R3                          | <b>0,0478</b>   | Unpaired t test with Welch's correction |

|         |               |                                         |
|---------|---------------|-----------------------------------------|
| C8-R3   | <b>0,045</b>  | Unpaired t test with Welch's correction |
| WT-C8R3 | <b>0,0313</b> | Unpaired t test with Welch's correction |
| WT-R3   | <b>0,0426</b> | Unpaired t test with Welch's correction |
| WT-WTnc | <b>0,0373</b> | Unpaired t test with Welch's correction |
| C8-WTnc | <b>0,0438</b> | Unpaired t test with Welch's correction |

**Figure 3B**

|             |                 |                                         |
|-------------|-----------------|-----------------------------------------|
| <b>CD45</b> | <b>p values</b> |                                         |
| C8-WT       | <b>0,0408</b>   | Unpaired t test with Welch's correction |
| C8-C8R3     | <b>0,0252</b>   | Unpaired t test with Welch's correction |

|              |                 |                                         |
|--------------|-----------------|-----------------------------------------|
| <b>F4/80</b> | <b>p values</b> |                                         |
| C8-C8R3      | <b>0,0302</b>   | Unpaired t test with Welch's correction |
| C8-R3        | <b>0,0355</b>   | Unpaired t test with Welch's correction |
| WT-C8R3      | <b>0,0001</b>   | Unpaired t-test                         |
| WT-R3        | <b>0,0001</b>   | Unpaired t-test                         |
| WT-WTnc      | <b>0,0097</b>   | Mann Whitney test                       |
| C8-WTnc      | <b>0,0097</b>   | Mann Whitney test                       |

**Figure 3C**

|              |                 |                                         |
|--------------|-----------------|-----------------------------------------|
| <b>MCP-1</b> | <b>p values</b> |                                         |
| C8-WT        | <b>0,0079</b>   | Unpaired t-test                         |
| C8-C8R3      | <b>0,0119</b>   | Unpaired t-test                         |
| C8-R3        | <b>0,008</b>    | Unpaired t-test                         |
| WT-R3        | <b>0,0173</b>   | Unpaired t-test                         |
| C8R3-R3      | <b>0,0173</b>   | Unpaired t-test                         |
| WT-WTnc      | <b>0,0237</b>   | Unpaired t test with Welch's correction |
| C8-WTnc      | <b>0,0001</b>   | Unpaired t test with Welch's correction |

|              |                 |                                         |
|--------------|-----------------|-----------------------------------------|
| <b>MCP-1</b> | <b>p values</b> |                                         |
| C8-WT        | <b>0,0215</b>   | Unpaired t test with Welch's correction |
| C8-C8R3      | <b>0,0098</b>   | Unpaired t test with Welch's correction |
| C8-R3        | <b>0,006</b>    | Unpaired t test with Welch's correction |
| WT-C8R3      | <b>0,0388</b>   | Unpaired t-test                         |
| WT-R3        | <b>0,036</b>    | Unpaired t-test                         |
| WT-WTnc      | <b>0,0039</b>   | Unpaired t test with Welch's correction |
| C8-WTnc      | <b>0,0045</b>   | Unpaired t test with Welch's correction |
| C8R3-WTnc    | <b>0,0052</b>   | Unpaired t test with Welch's correction |

**Figure 3D**

|              |                 |                                         |
|--------------|-----------------|-----------------------------------------|
| <b>MCP-1</b> | <b>p values</b> |                                         |
| C8-C8R3      | <b>0,0295</b>   | Unpaired t test with Welch's correction |
| C8-R3        | <b>0,034</b>    | Unpaired t test with Welch's correction |
| WT-C8R3      | <b>0,0226</b>   | Unpaired t test with Welch's correction |
| WT-R3        | <b>0,0243</b>   | Unpaired t test with Welch's correction |
| WT-WTnc      | <b>0,0018</b>   | Unpaired t test with Welch's correction |
| C8-WTnc      | <b>0,0121</b>   | Unpaired t test with Welch's correction |
| C8R3-WTnc    | <b>0,0483</b>   | Unpaired t test with Welch's correction |
| R3-WTnc      | <b>0,0029</b>   | Unpaired t test with Welch's correction |

|                   |                       |                        |                                         |
|-------------------|-----------------------|------------------------|-----------------------------------------|
|                   | <b>MCP-1</b>          | <b><i>p</i> values</b> |                                         |
|                   | C8-WT                 | <b>0,0465</b>          | Mann Whitney test                       |
|                   | C8-C8R3               | <b>0,0159</b>          | Mann Whitney test                       |
|                   | C8-R3                 | <b>0,0079</b>          | Mann Whitney test                       |
|                   | WT-R3                 | <b>0,0003</b>          | Unpaired t-test                         |
|                   | WT-WTnc               | <b>0,0039</b>          | Unpaired t test with Welch's correction |
|                   | C8-WTnc               | <b>0,0022</b>          | Mann Whitney test                       |
| <b>Figure 4B</b>  | <b>CK-19</b>          | <b><i>p</i> values</b> |                                         |
|                   | C8-WT                 | <b>0,0259</b>          | Unpaired t-test                         |
|                   | C8-C8R3               | <b>0,025</b>           | Unpaired t-test                         |
|                   | C8-R3                 | <b>0,0084</b>          | Unpaired t-test                         |
|                   | C8-WTnc               | <b>0,0237</b>          | Unpaired t test with Welch's correction |
| <b>Figure 6B</b>  | <b>p-cJUN</b>         | <b><i>p</i> values</b> |                                         |
|                   | DMSO-SP6              | <b>0,0056</b>          | Unpaired t test with Welch's correction |
| <b>Figure 6C</b>  | AST                   | <b><i>p</i> values</b> |                                         |
|                   | DMSO-SP6              | <b>0,0135</b>          | Unpaired t test with Welch's correction |
|                   | ALT                   | <b><i>p</i> values</b> |                                         |
|                   | DMSO-SP6              | <b>0,0437</b>          | Unpaired t test with Welch's correction |
|                   | GLDH                  | <b><i>p</i> values</b> |                                         |
|                   | DMSO-SP6              | <b>0,0127</b>          | Unpaired t test with Welch's correction |
| <b>Figure 6D</b>  | <b><i>Col1 α1</i></b> | <b><i>p</i> values</b> |                                         |
|                   | DMSO-SP6              | <b>0,021</b>           | Unpaired t test                         |
| <b>Figure 6E</b>  | <b>CD45</b>           | <b><i>p</i> values</b> |                                         |
|                   | DMSO-SP6              | <b>0,043</b>           | Unpaired t test with Welch's correction |
|                   | <b>F4/80</b>          | <b><i>p</i> values</b> |                                         |
|                   | DMSO-SP6              | <b>0,0103</b>          | Unpaired t-test                         |
| <b>Sup Fig 3B</b> | <b>Fibrotic Area</b>  | <b><i>p</i> values</b> |                                         |
|                   | C8-WT                 | <b>0,0001</b>          | Mann Whitney test                       |
|                   | C8-C8R3               | <b>0,0001</b>          | Mann Whitney test                       |
|                   | C8-R3                 | <b>0,0001</b>          | Mann Whitney test                       |
|                   | WT-C8R3               | <b>0,0191</b>          | Unpaired t test                         |
|                   | WT-R3                 | <b>0,0112</b>          | Unpaired t test with Welch's correction |
|                   | WT-WTnc               | <b>0,003</b>           | Unpaired t test with Welch's correction |
|                   | C8-WTnc               | <b>0,0001</b>          | Mann Whitney test                       |
|                   | <b><i>Col1 α1</i></b> | <b><i>p</i> values</b> |                                         |
|                   | C8-WT                 | <b>0,0026</b>          | Unpaired t test with Welch's correction |
|                   | C8-C8R3               | <b>0,0001</b>          | Unpaired t-test                         |
|                   | C8-R3                 | <b>0,003</b>           | Unpaired t test with Welch's correction |

|           |               |                                         |
|-----------|---------------|-----------------------------------------|
| WT-WTnc   | <b>0,0306</b> | Unpaired t-test                         |
| C8-WTnc   | <b>0,0016</b> | Unpaired t test with Welch's correction |
| C8R3-WTnc | <b>0,0206</b> | Unpaired t test with Welch's correction |
| R3-WTnc   | <b>0,0283</b> | Unpaired t test with Welch's correction |

**Sup Fig 4B**

|                |                 |                                         |
|----------------|-----------------|-----------------------------------------|
| <b>CCL4 2w</b> | <b>p values</b> |                                         |
| WT-WTnc        | <b>0,0007</b>   | Unpaired t test with Welch's correction |
| C8-WTnc        | <b>0,0025</b>   | Mann Whitney test                       |
| C8R3-WTnc      | <b>0,0031</b>   | Unpaired t test with Welch's correction |
| R3-WTnc        | <b>0,0188</b>   | Unpaired t test with Welch's correction |

|                |                 |                                         |
|----------------|-----------------|-----------------------------------------|
| <b>CCL4 8w</b> | <b>p values</b> |                                         |
| WT-WTnc        | <b>0,0001</b>   | Unpaired t test with Welch's correction |
| C8-WTnc        | <b>0,0014</b>   | Unpaired t test with Welch's correction |
| C8R3-WTnc      | <b>0,0073</b>   | Unpaired t test with Welch's correction |
| R3-WTnc        | <b>0,0001</b>   | Unpaired t test with Welch's correction |

**Sup Fig 5B**

|              |                 |                                         |
|--------------|-----------------|-----------------------------------------|
| <b>F4/80</b> | <b>p values</b> |                                         |
| C8-C8R3      | <b>0,0116</b>   | Unpaired t test with Welch's correction |
| C8-R3        | <b>0,0159</b>   | Mann Whitney test                       |

**Sup Fig 7A**

|               |                 |                   |
|---------------|-----------------|-------------------|
| <b>TNF 2w</b> | <b>p values</b> |                   |
| WT-WTnc       | <b>0,0104</b>   | Mann Whitney test |
| C8-WTnc       | <b>0,0043</b>   | Mann Whitney test |
| C8R3-WTnc     | <b>0,0043</b>   | Mann Whitney test |

|               |                 |                                         |
|---------------|-----------------|-----------------------------------------|
| <b>TNF 8w</b> | <b>p values</b> |                                         |
| WT-WTnc       | <b>0,0181</b>   | Unpaired t test with Welch's correction |
| C8-WTnc       | <b>0,0151</b>   | Unpaired t test with Welch's correction |
| C8R3-WTnc     | <b>0,0001</b>   | Unpaired t test                         |
| R3-WTnc       | <b>0,0005</b>   | Unpaired t test                         |
| C8-R3         | <b>0,0261</b>   | Unpaired t test                         |

**Sup Fig 7B**

|                                   |                 |                                         |
|-----------------------------------|-----------------|-----------------------------------------|
| <b>TGF-<math>\beta</math>2 2w</b> | <b>p values</b> |                                         |
| C8-WT                             | <b>0,0139</b>   | Unpaired t test with Welch's correction |
| C8-C8R3                           | <b>0,0124</b>   | Unpaired t test with Welch's correction |
| C8-R3                             | <b>0,0138</b>   | Unpaired t test with Welch's correction |
| C8-WTnc                           | <b>0,0151</b>   | Unpaired t test with Welch's correction |

|                                   |                 |                   |
|-----------------------------------|-----------------|-------------------|
| <b>TGF-<math>\beta</math>2 8w</b> | <b>p values</b> |                   |
| C8-C8R3                           | <b>0,0159</b>   | Mann Whitney test |
| WT-C8R3                           | <b>0,0079</b>   | Mann Whitney test |
| WT-WTnc                           | <b>0,0043</b>   | Mann Whitney test |
| C8-WTnc                           | <b>0,0043</b>   | Mann Whitney test |

**Sup Fig 9**

|              |                 |
|--------------|-----------------|
| <b>MCP-1</b> | <b>p values</b> |
|--------------|-----------------|

DMSO-SP6      **0,0055**      Unpaired t test with Welch's correction

**MCP-1**      ***p* values**  
DMSO-SP6      **0,01**      Unpaired t test with Welch's correction
