# Supplementary material for: A positive feedback loop between RIP3 and JNK controls non-alcoholic steatohepatitis
Source: PubMed Central journal article supplement (PMC4154133; doi:10.15252/emmm.201403856), 2014-06-24

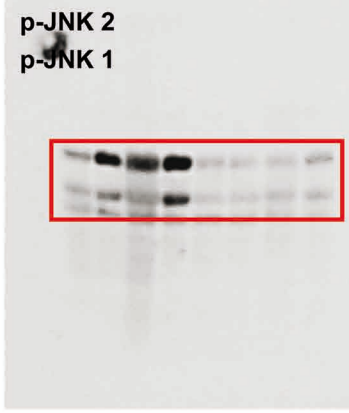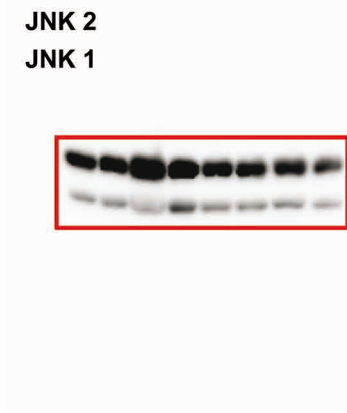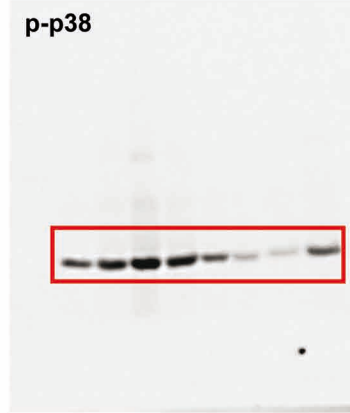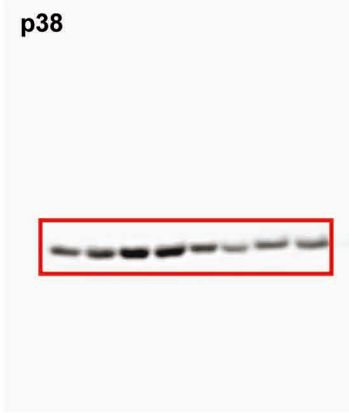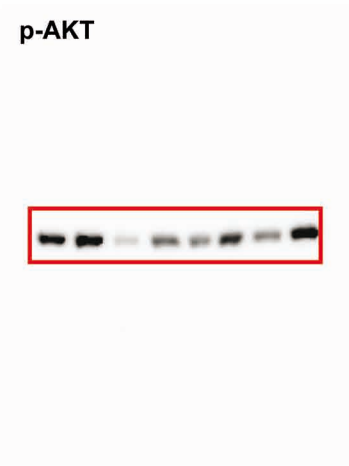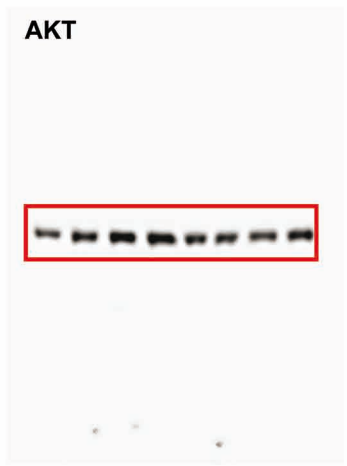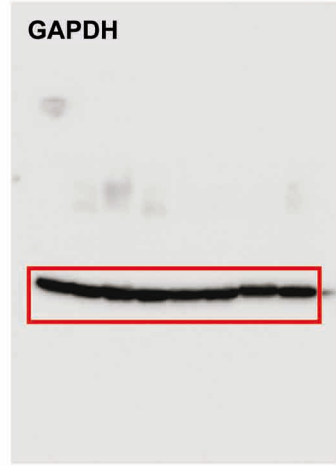

Figure 6A

RIP3

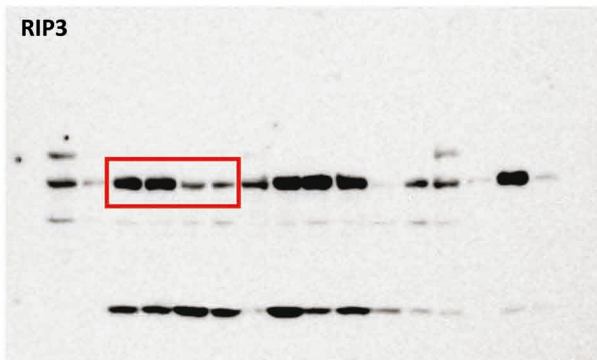

GAPDH

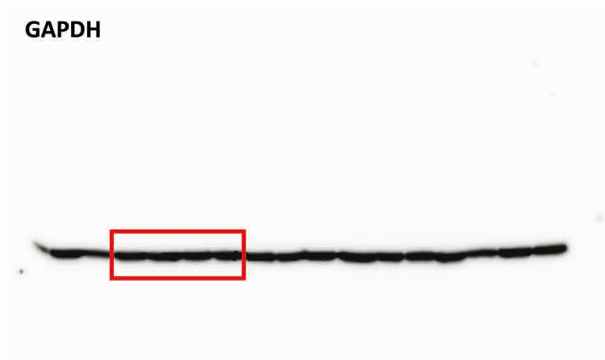

Supplement: emmm0006-1062-sd20.pdf [file emmm0006-1062-sd20.pdf]
